# Supplementary material for: LiNi0.6Co0.2Mn0.2O2 Cathode-Solid Electrolyte Interfacial Behavior Characterization Using Novel Method Adopting Microcavity Electrode
Source: MDPI journal article supplement (doi:10.3390/molecules28083537), 2023-04-17
Supplement: s1 [file s1]

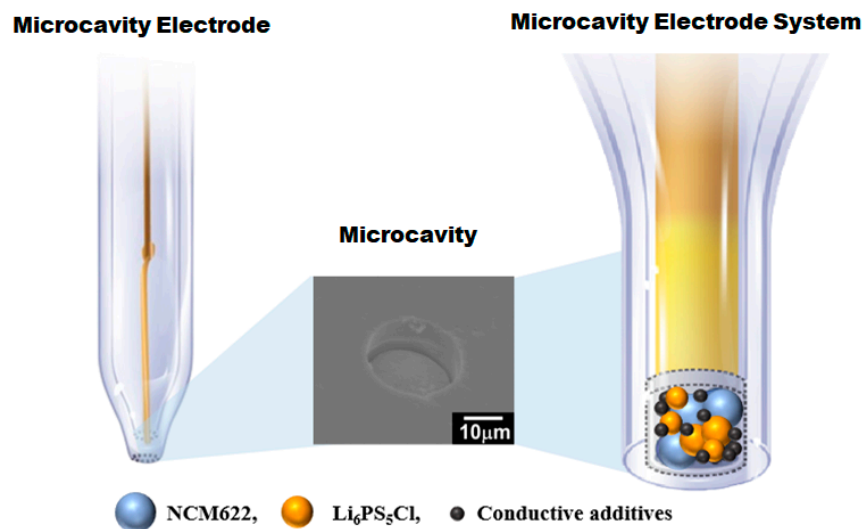

**Figure S1.** Pictorial representation of microcavity electrode, microcavity electrode system and image of the microcavity.

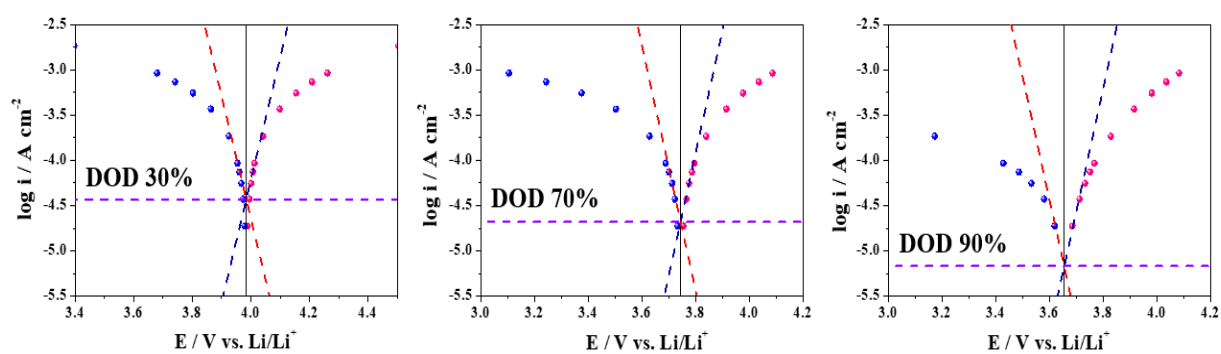

**Figure S2.** Tafel plots of NCM622-  $\text{Li}_6\text{PS}_5\text{Cl}$  system at DOD 30%, DOD 70%, and DOD 90% states.

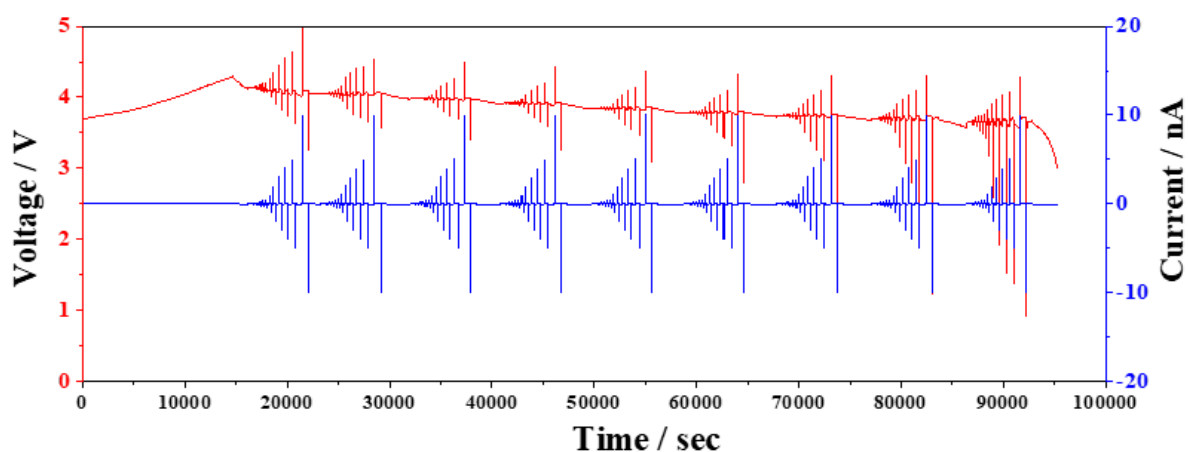

**Figure S3.** The applied pulse of various current densities in each DOD state to NCM622-Li<sub>6</sub>PS<sub>5</sub>Cl system.

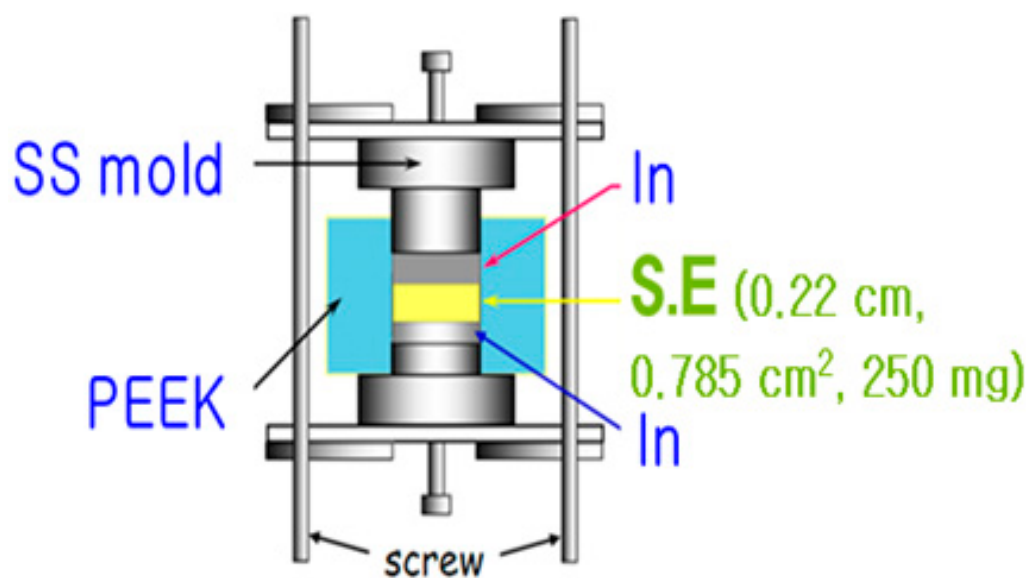

**Figure S4.** Pictorial representation of assembled pressure cell.

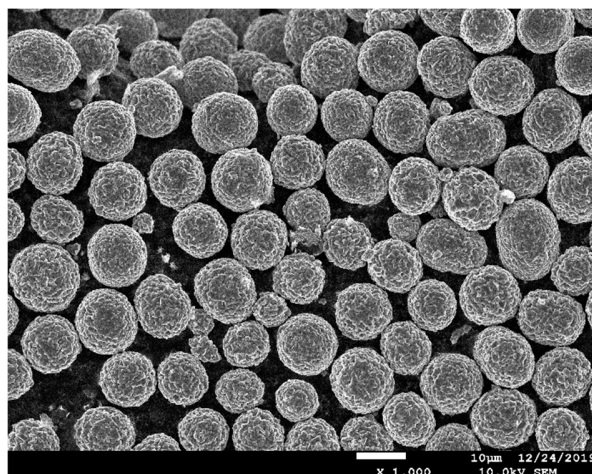

**Figure S5.** FE-SEM image of NCM622 cathode active materials.
